# Supplementary material for: The Putative RNA-Binding Protein Dri1 Promotes the Loading of Kinesin-14/Klp2 to the Mitotic Spindle and Is Sequestered into Heat-Induced Protein Aggregates in Fission Yeast
Source: MDPI journal article supplement (doi:10.3390/ijms22094795), 2021-04-30
Supplement: s1 [file s1]

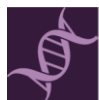

*Supplementary Materials*

# The Putative RNA-Binding Protein Dri1 Promotes the Loading of Kinesin-14/Klp2 to the Mitotic Spindle and Is Sequestered into Heat-Induced Protein Aggregates in Fission Yeast

Masashi Yukawa <sup>1,2,\*</sup>, Mitsuki Ohishi <sup>1</sup>, Yusuke Yamada <sup>1</sup>, and Takashi Toda <sup>1,2</sup>

Supplementary Figure S1: Suppression of the *ts* phenotype of *cut7* by *dri1Δ* is allele-specific.

Supplementary Figure S2: Various truncated/mutated Dri1 proteins are expressed normally like the full-length protein.

Supplementary Figure S3: Dri1 is dispensable for the Mal3 localization on the spindle microtubules.

Supplementary Figure S4: Dri1 is exported from the nucleus in a Rae1-dependent manner.

Supplementary Figure S5: A portion of the Dri1 protein co-localizes with other PAC components upon mild temperature shift-up.

Supplementary Figure S6: Characteristics of cell division in wild-type and *dri1Δ* cells grown at 39°C.

Supplementary Figure S7: Sensitivity/resistance of the *dri1* mutants is not altered under various stress conditions besides high temperature.

Supplementary Figure S8: Full scans of original images.

Supplementary Table S1: Fission yeast strains used in this study.

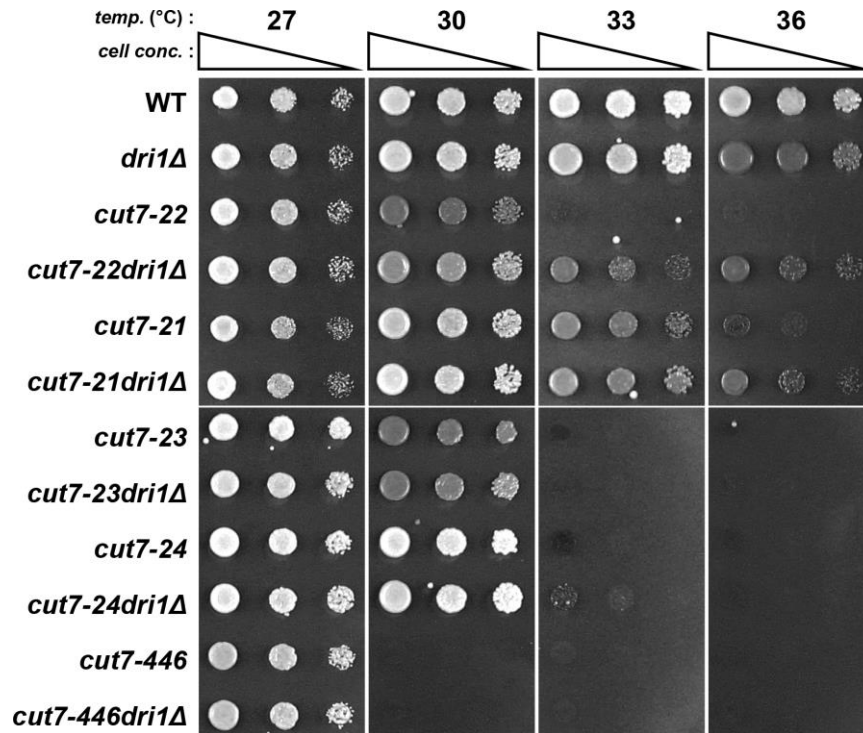

**Supplementary Figure S1.** Suppression of the ts phenotype of *cut7* by *dri1Δ* is allele-specific. Indicated strains were spotted onto rich YE5S agar plates and incubated at various temperatures for 2–3 days. 10-fold serial dilutions were performed in each spot.

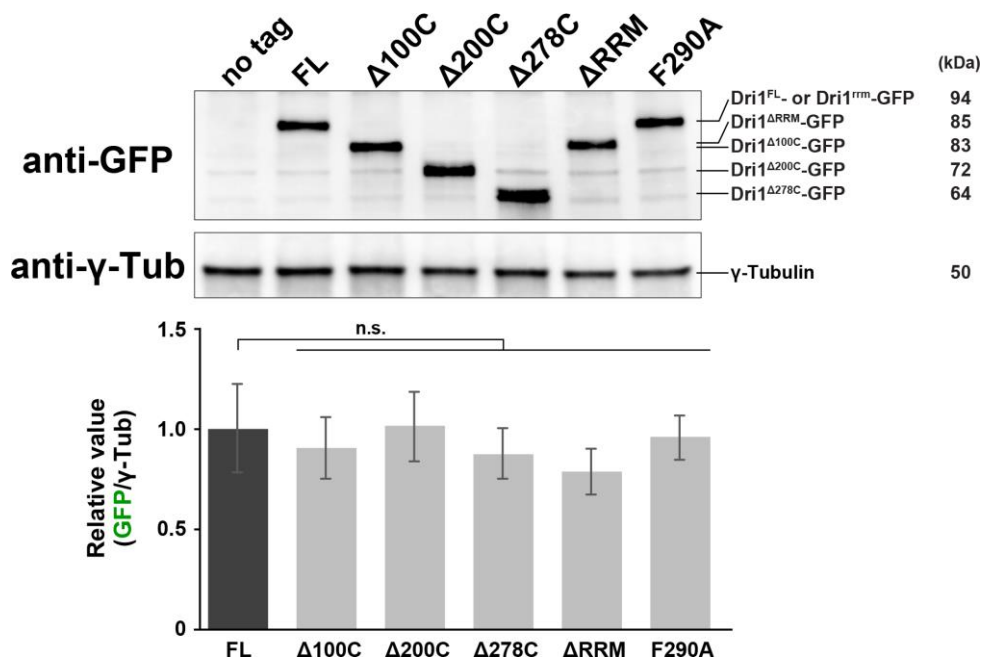

**Supplementary Figure S2.** Various truncated/mutated Dri1 proteins are expressed normally like the full-length protein. Quantification of the total levels of the full-length and various truncated/mutated Dri1-GFP proteins in whole-cell extracts was performed. Indicated strains containing Dri1-GFP and a control non-tagged strain were grown at 27 °C and protein extracts were prepared, followed by immunoblotting with anti-GFP and anti- $\gamma$ -tubulin antibodies. Relative amounts of each Dri1-GFP protein were normalized using those of  $\gamma$ -tubulin as a control. Results are given as the means  $\pm$  SE (n = 4). The relative amounts obtained from wild-type cells incubated at 27 °C were set as 1 and compared to those from other strains incubated at the same temperature. Data sets were compared with a two-tailed unpaired Student's t-tests (n.s., not significant).

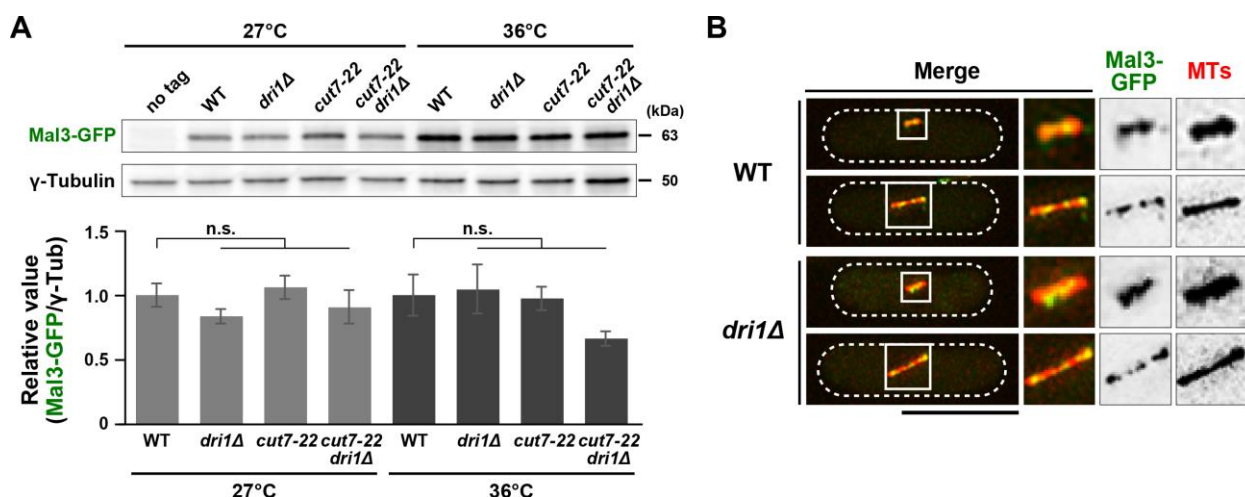

**Supplementary Figure S3.** Dri1 is dispensable for the Mal3 localization on the spindle microtubules. **(A)** Quantification of the total levels of Mal3-GFP protein in whole-cell extracts. Indicated strains containing Mal3-GFP and a control non-tagged strain were grown at 27 °C or 36 °C for 2h, and protein extracts were prepared, followed by immunoblotting with anti-GFP and anti- $\gamma$ -tubulin antibodies. Relative amounts of each Mal3-GFP protein were normalized using those of  $\gamma$ -tubulin as a control. Results are given as the means  $\pm$  SE ( $n = 2$ ). The relative amounts obtained from wild-type cells incubated at 27 °C and 36 °C were set as 1 and compared to those from other strains incubated at the same temperature. Data sets were compared with a two-tailed unpaired Student's *t*-tests (n.s., not significant). **(B)** Representative images showing mitotic localization of Mal3-GFP on the spindle microtubule are presented in wild-type and *dri1Δ* cells. Both strains contain Mal3-GFP and mCherry-Atb2. Cells were incubated at 27 °C. The cell peripheries are outlined with dotted lines and areas containing spindle microtubules (squares) are enlarged in the three panels on the right-hand side. Scale bars, 10  $\mu$ m (bottom left) and 1  $\mu$ m (right).

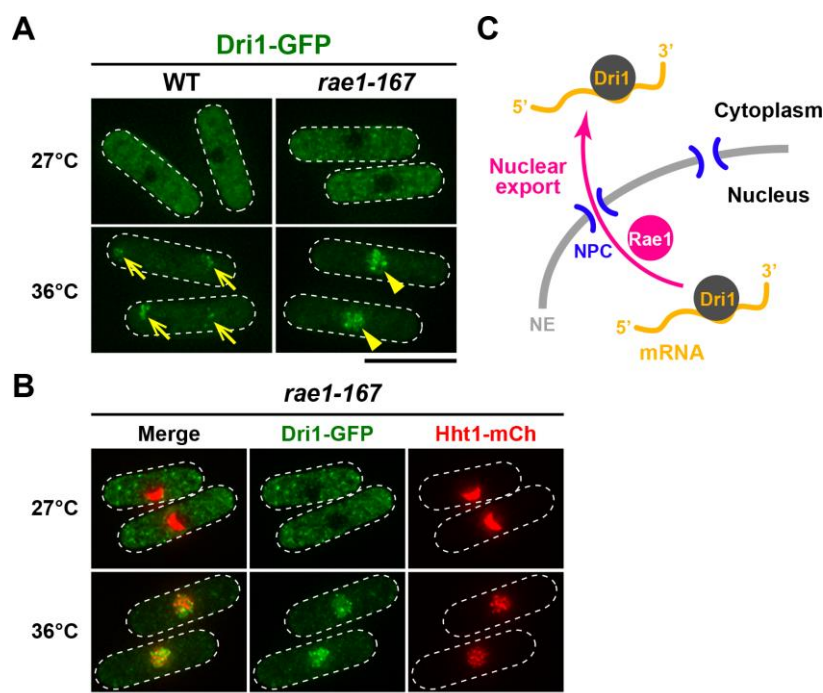

**Supplementary Figure S4.** Dri1 is exported directly or indirectly from the nucleus in a Rae1-dependent manner. **(A)** Wild-type and *rae1-167* cells containing Dri1-GFP were grown at 27 °C and then shifted to 36 °C for 2 h. The cytoplasmic aggregates formed at 36 °C in wild-type cells are pointed with yellow arrows, while the nuclear foci formed in *rae1-167* cells are shown with yellow arrowheads. **(B)** *rae1-167* cells containing Dri1-GFP and the chromatin marker Hht1-mCherry (Histone H3 h3.1) were grown at 27 °C and then shifted to 36 °C for 2 h. **(C)** A schematic illustration representing the export of Dri1 from the nucleus to the cytoplasm through the Rae1-dependent mRNA export pathway. The cell peripheries are indicated with dotted lines. Scale bars, 10  $\mu$ m.

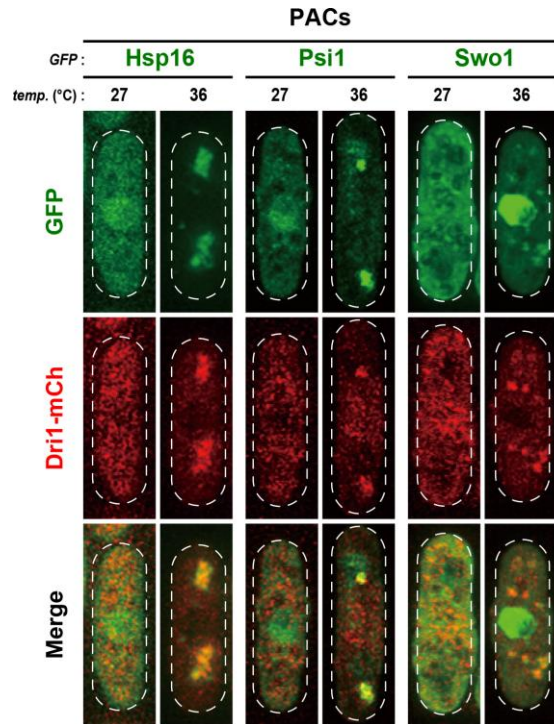

**Supplementary Figure S5.** A portion of the Dri1 protein co-localizes with other PACs components upon mild-temperature shift-up. Co-localization of Dri1-mCherry and different GFP-tagged chaperones (Hsp16, Psi1/Hsp40 and Swo1/Hsp90) after incubation at 36 °C for 2 h. The cell peripheries are indicated with dotted lines. Scale bar, 10  $\mu$ m.

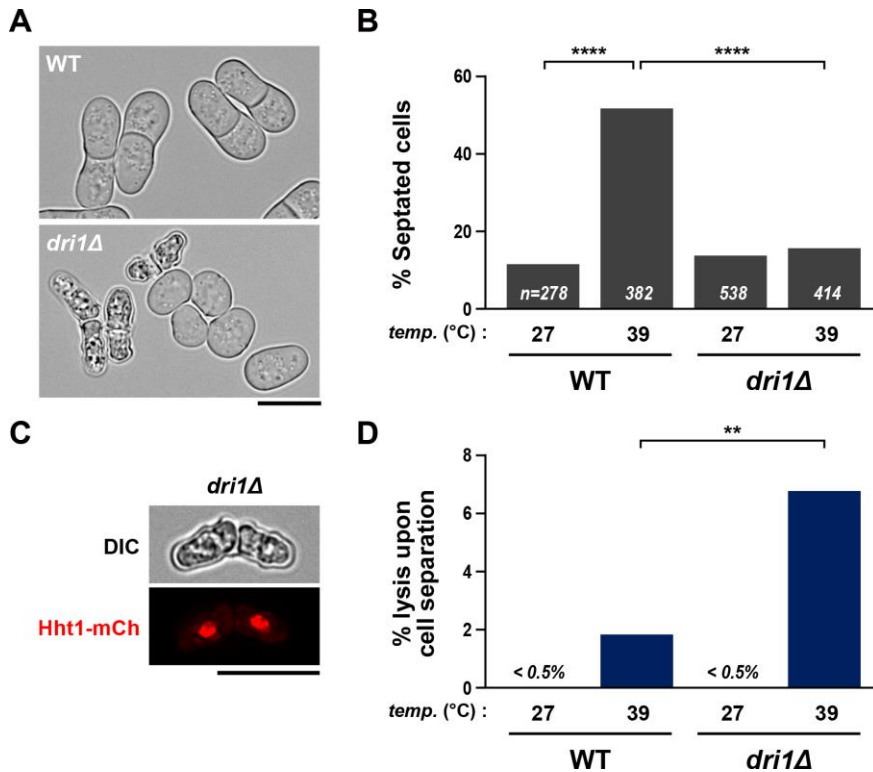

**Supplementary Figure S6.** Characteristics of cell division in wild-type and *dri1Δ* cells grown at 39 °C. (A) Wild-type and *dri1Δ* cells grown at 27 °C were shifted to 39 °C and incubated for 12 h. Representative images of cell morphologies are shown (top, wild-type; bottom, *dri1Δ*). (B) The percentage of cells containing septa in wild-type and *dri1Δ* cells grown at 27 °C or 39 °C. The sample size (n) is shown on the bottom of each column. (C) Representative images of *dri1Δ* cells displaying lysis upon cell separation at 39 °C. *dri1Δ* cells containing Hht1-mCherry (Histone H3 h3.1) grown at 39 °C were imaged (top, DIC; bottom Hht1-mCherry). (D) The percentage of cells displaying the cell lysis phenotype upon cell separation. Cells used in (C) were also counted in this figure. All *p*-values were obtained from the two-tailed  $\chi^2$  test. \*\*, *p* < 0.01, \*\*\*\*, *p* < 0.0001, Scale bars, 10  $\mu$ m.

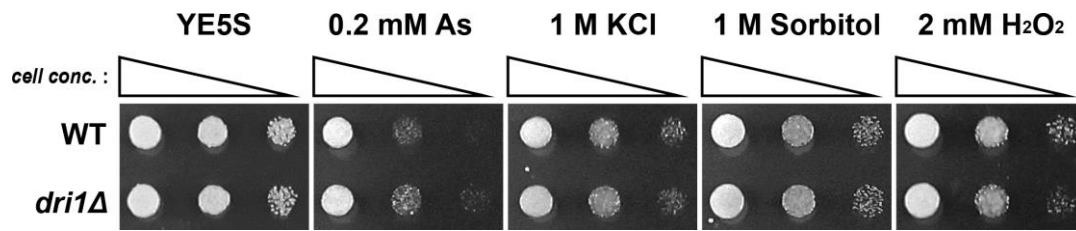

**Supplementary Figure S7.** Sensitivity/resistance of the *dri1* mutants is not altered under various stress conditions besides high temperature. Indicated strains were serially (10-fold) diluted, spotted onto rich YE5S plates that contains various reagents and incubated at various temperatures for 2–3 d.

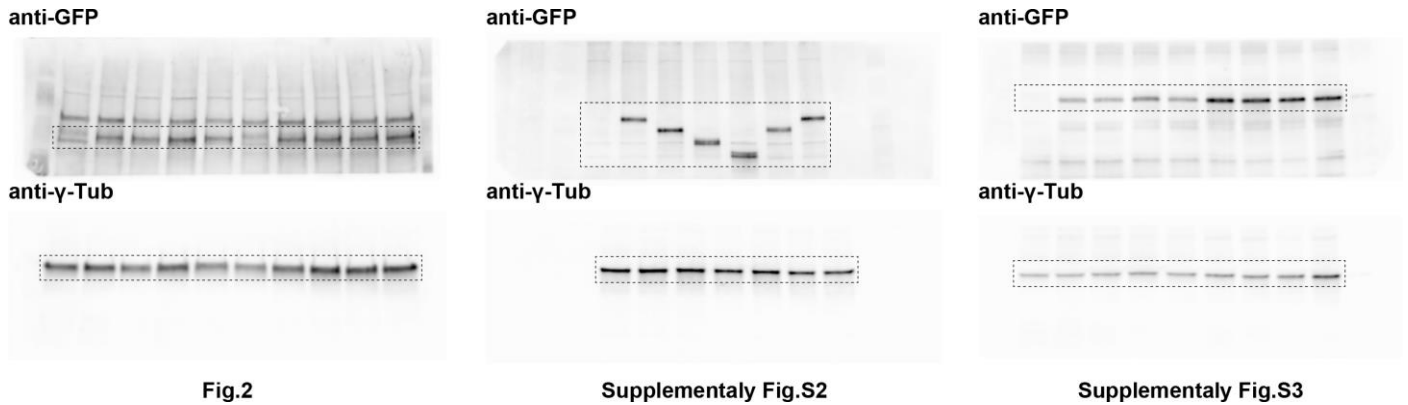

**Supplementary Figure S8.** Full scans of original images.

**Supplementary Table S1.** Fission yeast strains used in this study

| Strains | Genotypes                                                                                                 | Figures used                    | Derivations   |
|---------|-----------------------------------------------------------------------------------------------------------|---------------------------------|---------------|
| 513     | <i>h<sup>-</sup> leu1 ura4</i>                                                                            | 1C, 2D, 4D, 6C, S1, S2, S3A, S7 | Our lab stock |
| YY146   | <i>h<sup>+</sup> cut7-22 leu1ura4 his2</i>                                                                | 1C, 4D, S1                      | Our lab stock |
| YY50    | <i>h<sup>+</sup> cut7-22 dri1-W46X leu1ura4 his2</i>                                                      | 1C                              | This study    |
| MY1479  | <i>h<sup>+</sup> cut7-22 dri1::kanR leu1 ura4 his2</i>                                                    | 1C, S1                          | This study    |
| MY2087  | <i>h<sup>-</sup> cut7-22 dri1Δ100C-GFP-kanR leu1 ura4</i>                                                 | 1C                              | This study    |
| MY2106  | <i>h<sup>-</sup> cut7-22 dri1Δ200C-GFP-kanR leu1 ura4</i>                                                 | 1C                              | This study    |
| MY2108  | <i>h<sup>-</sup> cut7-22 dri1Δ278C-GFP-kanR leu1 ura4</i>                                                 | 1C                              | This study    |
| MY2089  | <i>h<sup>-</sup> cut7-22 dri1ΔRRM-GFP-kanR leu1 ura4</i>                                                  | 1C                              | This study    |
| MY2135  | <i>h<sup>-</sup> cut7-22 dri1-F290A-GFP-kanR leu1 ura4</i>                                                | 1C                              | This study    |
| MY1744  | <i>h<sup>-</sup> kanR-Palp4-GFP-klp2 aur1::aur1R-Pnda3-mCherry-atb2 leu1 ura4</i>                         | 2A-D, 5C                        | This study    |
| MY1746  | <i>h<sup>+</sup> cut7-22 kanR-Palp4-GFP-klp2 aur1::aur1R-Pnda3-mCherry-atb2 leu1 ura4 his2</i>            | 2A-D                            | This study    |
| MY1747  | <i>h<sup>+</sup> cut7-22 dri1::kanR kanR-Palp4-GFP-klp2 aur1::aur1R-Pnda3-mCherry-atb2 leu1 ura4 his2</i> | 2A-D                            | This study    |
| MY1745  | <i>h<sup>-</sup> dri1::kanR kanR-Palp4-GFP-klp2 aur1::aur1R-Pnda3-mCherry-atb2 leu1 ura4</i>              | 2B-D                            | This study    |
| MiO222  | <i>h<sup>+</sup> dri1-GFP-KanR sid4-mRFP-natR aur1::aur1R-Pnda3-mCherry-atb2 leu1 ura4</i>                | 3A                              | This study    |
| MY2170  | <i>h<sup>-</sup> dri1-GFP-kanR hht1-mCherry-kanR leu1 ura4</i>                                            | 3B-C                            | This study    |
| MY2171  | <i>h<sup>+</sup> dri1Δ100C-GFP-kanR hht1-mCherry-kanR leu1 ura4</i>                                       | 3B-C                            | This study    |
| MY2174  | <i>h<sup>+</sup> dri1Δ200C-GFP-kanR hht1-mCherry-kanR leu1 ura4 his2</i>                                  | 3B-C                            | This study    |
| MY2175  | <i>h<sup>+</sup> dri1Δ278C-GFP-kanR hht1-mCherry-kanR leu1 ura4 his2</i>                                  | 3B-C                            | This study    |
| MY2177  | <i>h<sup>+</sup> dri1ΔRRM-GFP-kanR hht1-mCherry-kanR leu1 ura4 his2</i>                                   | 3B-C                            | This study    |
| MY2178  | <i>h<sup>-</sup> dri1-F290A-GFP-kanR hht1-mCherry-kanR leu1 ura4</i>                                      | 3B-C                            | This study    |
| MY2467  | <i>h<sup>-</sup> dri1-mCherry-hphR hsp104-GFP-ura4<sup>+</sup> leu1? ura4?</i>                            | 4A                              | This study    |
| MY2477  | <i>h<sup>-</sup> dri1-mCherry-hphR ssa1-GFP-natR leu1? ura4?</i>                                          | 4A                              | This study    |
| MY2434  | <i>h<sup>+</sup> dri1-mCherry-hphR sty1'-GFP-ssa2-leu1+ leu1 ura4</i>                                     | 4A                              | This study    |
| MY2491  | <i>h<sup>+</sup> dri1-mCherry-hphR sty1'-GFP-mas5-leu1<sup>+</sup> leu1? ura4? his2</i>                   | 4A                              | This study    |



|        |                                                                                                         |             |               |
|--------|---------------------------------------------------------------------------------------------------------|-------------|---------------|
| MY2473 | <i>h<sup>-</sup> dri1-mCherry-hphR eIF4E-GFP-natR leu1? ura4?</i>                                       | 4A          | This study    |
| MY1799 | <i>h<sup>-</sup> dri1-mNeonGreen-hphR leu1 ura4</i>                                                     | 4B          | This study    |
| MY2520 | <i>h<sup>-</sup> dri1-mNeonGreen-hphR hsp104::kanR leu1 ura4</i>                                        | 4B          | This study    |
| MY2526 | <i>h<sup>-</sup> dri1-mNeonGreen-hphR psi1::ura4<sup>+</sup> leu1 ura4</i>                              | 4B          | This study    |
| MY2536 | <i>h<sup>-</sup> dri1-mNeonGreen-hphR mas5::kanR leu1 ura4</i>                                          | 4B          | This study    |
| MY2532 | <i>h<sup>-</sup> hsp104-GFP-ura4<sup>+</sup> dri1::kanR leu1? ura4?</i>                                 | 4C          | This study    |
| MY2528 | <i>h<sup>-</sup> sty1'-GFP-mas5-leu1<sup>+</sup> dri1::kanR leu1 ura4?</i>                              | 4C          | This study    |
| MY2413 | <i>h<sup>+</sup> hsp104::kanR ura4 leu1 his2</i>                                                        | 4D          | This study    |
| MY2425 | <i>h<sup>-</sup> psi1::ura4<sup>+</sup> ura4? leu1</i>                                                  | 4D          | This study    |
| MY2544 | <i>h<sup>+</sup> mas5::kanR leu1? ura4 his2</i>                                                         | 4D          | This study    |
| MY2415 | <i>h<sup>+</sup> cut7-22 hsp104::kanR leu1 his2</i>                                                     | 4D          | This study    |
| MY2427 | <i>h<sup>+</sup> cut7-22 psi1::ura4<sup>+</sup> ura4? leu1 his2</i>                                     | 4D          | This study    |
| MY2551 | <i>h<sup>+</sup> cut7-22 mas5::kanR leu1? ura4 his2</i>                                                 | 4D          | This study    |
| MY2698 | <i>h<sup>+</sup> cut7-22 dri1-GBP-6HIS-mCherry-hphR sty1'-GFP-ssa2-leu1<sup>+</sup> leu1? ura4?</i>     | 5A-B        | This study    |
| MY2669 | <i>h<sup>-</sup> dri1-GBP-6HIS-mCherry-hphR leu1? ura4?</i>                                             | 5B          | This study    |
| MY2623 | <i>h<sup>+</sup> cut7-22 dri1-GBP-6HIS-mCherry-hphR leu1 ura4 his2</i>                                  | 5B          | This study    |
| MY2743 | <i>h<sup>+</sup> cut7-22 sty1'-GFP-ssa2-leu1<sup>+</sup> aur1::aur1R-Pnda3-mCherry-atb2 leu1? ura4?</i> | 5C          | This study    |
| MY2744 | <i>h<sup>+</sup> cut7-22 dri1-GBP-6HIS-mCherry-hphR aur1::aur1R-Pnda3-mCherry-atb2 leu1? ura4?</i>      | 5C          | This study    |
| MY2746 | <i>h<sup>+</sup> cut7-22 dri1-GBP-6HIS-mCherry-hphR aur1::aur1R-Pnda3-mCherry-atb2 leu1? ura4?</i>      | 5C          | This study    |
| MiO99  | <i>h<sup>-</sup> dri1-GFP-kanR leu1 ura4</i>                                                            | 6A, S2, S4A | This study    |
| MY1978 | <i>h<sup>-</sup> dri1-mNeonGreen-hphR pabp-mRFP-hphR leu1 ura4</i>                                      | 6B          | This study    |
| MiO233 | <i>h<sup>+</sup> dri1-mNeonGreen-hphR dcp1-mCherry-natR leu1 ura4 his2</i>                              | 6B          | This study    |
| MiO77  | <i>h<sup>+</sup> dri1::kanR leu1 ura4 his2</i>                                                          | 6C, S1, S7  | This study    |
| MY2064 | <i>h<sup>-</sup> dri1Δ100C-GFP-kanR leu1 ura4</i>                                                       | 6C, S2      | This study    |
| MY2066 | <i>h<sup>-</sup> dri1Δ200C-GFP-kanR leu1 ura4</i>                                                       | 6C, S2      | This study    |
| MY2068 | <i>h<sup>-</sup> dri1Δ278C-GFP-kanR leu1 ura4</i>                                                       | 6C, S2      | This study    |
| MY2691 | <i>h<sup>-</sup> dri1ΔRRM-GFP-kanR leu1 ura4</i>                                                        | 6C, S2      | This study    |
| MY2120 | <i>h<sup>+</sup> dri1-F290A-GFP-kanR leu1 ura4 his2</i>                                                 | 6C, S2      | This study    |
| MY1008 | <i>h<sup>-</sup> cut7-21 leu1 ura4</i>                                                                  | S1          | Our lab stock |
| MiO107 | <i>h<sup>-</sup> cut7-21 dri1::kanR leu1 ura4</i>                                                       | S1          | This study    |
| MA2-3D | <i>h<sup>-</sup> cut7-23 leu1</i>                                                                       | S1          | Our lab stock |
| MiO108 | <i>h<sup>-</sup> cut7-23 dri1::kanR leu1 ura4</i>                                                       | S1          | This study    |
| IH136  | <i>h<sup>-</sup> cut7-24 leu1</i>                                                                       | S1          | Our lab stock |
| MiO109 | <i>h<sup>-</sup> cut7-24 dri1::kanR leu1 ura4</i>                                                       | S1          | This study    |
| NK193  | <i>h<sup>+</sup> cut7-446 leu1 his2</i>                                                                 | S1          | Our lab stock |
| MiO110 | <i>h<sup>+</sup> cut7-446 dri1::kanR leu1 ura4 his2</i>                                                 | S1          | This study    |
| MA145  | <i>h<sup>-</sup> mal3-GFP-kanR leu1 ura4</i>                                                            | S3A-B       | Our lab stock |
| MY2247 | <i>h<sup>-</sup> mal3-GFP-kanR dri1::natR leu1 ura4</i>                                                 | S3A-B       | This study    |
| MY2264 | <i>h<sup>-</sup> cut7-22 mal3-GFP-kanR leu1 ura4</i>                                                    | S3A         | This study    |
| MY2266 | <i>h<sup>-</sup> cut7-22 dri1::natR mal3-GFP-kanR leu1 ura4</i>                                         | S3A         | This study    |
| MiO190 | <i>h<sup>-</sup> rae1-167 dri1-GFP-kanR leu1? ura4</i>                                                  | S4A         | This study    |
| MY2741 | <i>h<sup>-</sup> rae1-167 dri1-GFP-kanR hht1-mCherry-kanR leu1? ura4</i>                                | S4B         | This study    |
| MY2475 | <i>h<sup>-</sup> dri1-mCherry-hphR hsp16-GFP-natR leu1? ura4?</i>                                       | S5          | This study    |
| MY2471 | <i>h<sup>-</sup> dri1-mCherry-hphR sty1'-GFP-psi1-leu1<sup>+</sup> ura4?</i>                            | S5          | This study    |
| MY2469 | <i>h<sup>+</sup> dri1-mCherry-hphR swo1-GFP-natR leu1? ura4? his2</i>                                   | S5          | This study    |
| MY1281 | <i>h<sup>-</sup> cut12-GFP-ura4<sup>+</sup> aur1::aur1R-Pnda3-mCherry-atb2 leu1 ura4</i>                | S6A-B, S6D  | This study    |
| MY2757 | <i>h<sup>-</sup> dri1::kanR cut12-GFP-ura4<sup>+</sup> aur1::aur1R-Pnda3-mCherry-atb2 leu1 ura4</i>     | S6A-B, S6D  | This study    |
| MY2759 | <i>h<sup>-</sup> dri1::kanR hht1-mCherry-kanR rlc1-GFP-ura4<sup>+</sup> leu1 ura4</i>                   | S6C         | This study    |

\*Strains were developed for this study unless otherwise specified. *his2*=*his2*-245; *leu1*=*leu1*-32; *ura4*=*ura4*-D18.

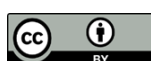

**Copyright:** © 2021 by the author. Licensee MDPI, Basel, Switzerland. This article is an open access article distributed under the terms and conditions of the Creative Commons Attribution (CC BY) license (<http://creativecommons.org/licenses/by/4.0/>).
